# Supplementary material for: NSC 95397 Suppresses Proliferation and Induces Apoptosis in Colon Cancer Cells through MKP-1 and the ERK1/2 Pathway
Source: MDPI journal article supplement (doi:10.3390/ijms19061625), 2018-05-31
Supplement: s1 [file s1]

## Supplementary Materials

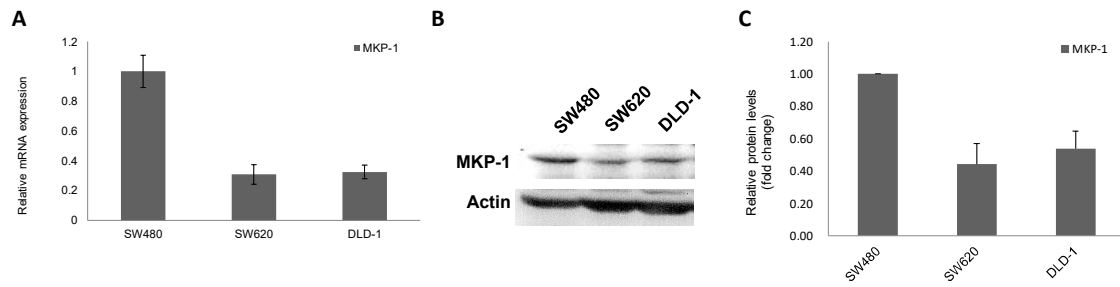

**Figure S1.** The expression of MKP-1 in colon cancer cells. (A) mRNA expression of MKP-1 were evaluated by real-time PCR. Values (means  $\pm$  SD) indicate relative mRNA levels compared to SW480 (=1.0) after normalization to eEF1 $\alpha$  loading control. (B) Representative western blots showing expression of MKP-1 in SW480, SW620 and DLD-1 cells, with actin as loading control. (C) Quantitative analysis of the relative protein expression of MKP-1. Values (means + SD) are normalized to actin loading and are relative to SW480 levels (=1.0).

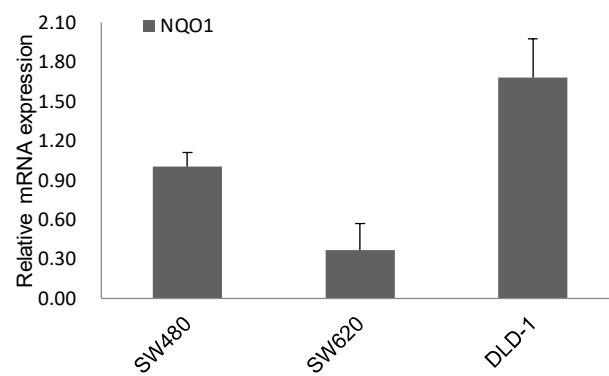

**Figure S2.** The mRNA expression of NQO1 in colon cancer cells. mRNA expression of NQO1 were evaluated by real-time PCR. Values (means + SD) indicate relative mRNA levels compared to SW480 (=1.0) after normalization to eEF1 $\alpha$  loading control.
